# Supplementary material for: Sustainable aviation fuel from forestry residue and hydrogen – a techno-economic and environmental analysis for an immediate deployment of the PBtL process in Europe
Source: Royal Society of Chemistry journal article supplement (doi:10.1039/d3se00358b), 2023-01-01
Supplement: d3se00358b1.pdf [file d3se00358b1.pdf]

## **Supplementary Material**

### **Sustainable aviation fuel from forestry residue and hydrogen – a techno-economic and environmental analysis for an immediate deployment of the PBtL process in Europe**

Felix Habermeyer, Veatriki Papantoni, Ralph-Uwe Dietrich and Urte Brand-Daniels

## Modelling Assumptions

Tab. 1. Modelling assumptions implemented in Aspen Plus®.

| Unit              | Description                                                                                                                                                                                                                                                                                                                                                                                                                                                                                                                                                                                                                                                                                                                                                                                                                                                                                          | Source       |
|-------------------|------------------------------------------------------------------------------------------------------------------------------------------------------------------------------------------------------------------------------------------------------------------------------------------------------------------------------------------------------------------------------------------------------------------------------------------------------------------------------------------------------------------------------------------------------------------------------------------------------------------------------------------------------------------------------------------------------------------------------------------------------------------------------------------------------------------------------------------------------------------------------------------------------|--------------|
| Dryer             | Biomass moisture outlet: 15 wt-%, heat consumption: $1300 \text{ kWh/t}_{\text{H}_2\text{Oevap}}$ ,<br>power consumption: $32 \text{ kWh/t}_{\text{drybio}}$ ,<br>pressure: 1 bar                                                                                                                                                                                                                                                                                                                                                                                                                                                                                                                                                                                                                                                                                                                    | <sup>1</sup> |
| Gasifier          | Heat loss = 1 % of input biomass LHV. $\Delta p = -0.2 \text{ bar}$ . $T = 850^\circ\text{C}$ , $p = 4.0 \text{ bar}$ <sup>1</sup><br>Oxygen feed iterated to attain specified heat loss<br>Minimum $\text{CO}_2/\text{O}$ input = 1.0 (mass based)<br>Feeding temperature = $200^\circ\text{C}$<br>Modelled with RStoic and RGibbs.<br>RGibbs (PR-BM) temperature $900^\circ\text{C}$<br>Hydrocarbon formation (mol/kg of fuel volatiles):<br>$\text{CH}_4 = 6.7826$ , $\text{C}_2\text{H}_4 = 0.4743$ , $\text{C}_2\text{H}_6 = 0.2265$ , $\text{C}_6\text{H}_6 = 0.2764$<br>Tars modelled as naphthalene: $\text{C}_{10}\text{H}_8 = 0.0671$<br>Fuel nitrogen converted to $\text{NH}_3$<br>Fuel sulphur converted to $\text{H}_2\text{S}$<br>Fuel ash to 100% to fly ash<br>Fuel carbon: 0.05 % to fly ash<br>All other components assumed to be in simultaneous phase and chemical equilibrium. |              |
| Filter            | $\Delta p = -0.2 \text{ bar}$ . Inlet temperature $550^\circ\text{C}$<br>Complete removal of ash                                                                                                                                                                                                                                                                                                                                                                                                                                                                                                                                                                                                                                                                                                                                                                                                     | <sup>1</sup> |
| Reformer          | $T = 850^\circ\text{C}$<br>Adiabatic<br>Oxygen feed iterated to attain specified heat loss<br>Modelled as RGibbs<br>Phase and chemical equilibrium conversion for $\text{C}_{2+}$ and tar.<br>$\text{CH}_4$ conversion: 35 %<br>$\text{NH}_3$ conversion: 50 %<br>$\Delta p = -0.2 \text{ bar}$                                                                                                                                                                                                                                                                                                                                                                                                                                                                                                                                                                                                      | <sup>1</sup> |
| Water scrubber    | Scrubbing liquid: water. $T_{\text{inlet}} = 200^\circ\text{C}$ . Two-step cooling: $T_{1 \text{ out}} = 60^\circ\text{C}$ , $T_{2 \text{ out}} = 30^\circ\text{C}$ . Modelled as Flash using Soave-Redlich-Kwong (SRK) equation of state model.                                                                                                                                                                                                                                                                                                                                                                                                                                                                                                                                                                                                                                                     | <sup>1</sup> |
| Syngas compressor | $p_{\text{out}} = 25 \text{ bar}$<br>5 stages with intercooling to $100^\circ\text{C}$<br>Equal pressure ratio<br>Isentropic efficiency 80 %<br>Mechanical efficiency 100 %                                                                                                                                                                                                                                                                                                                                                                                                                                                                                                                                                                                                                                                                                                                          | <sup>1</sup> |

|                            |                                                                                                                                                                                                                                                   |      |
|----------------------------|---------------------------------------------------------------------------------------------------------------------------------------------------------------------------------------------------------------------------------------------------|------|
| Selexol scrubber           | T = 0 °C<br>90 % removal of CO <sub>2</sub><br>removal of ammonia (100%) and H <sub>2</sub> S (90 %)<br>Modelled as a separator block<br>Energy consumption: 74 kJ/kg <sub>CO<sub>2</sub>,removed</sub><br>CO <sub>2</sub> outlet pressure: 1 bar | 2, 3 |
| Guard bed                  | Complete removal of trace components<br>Modelled as a separator block                                                                                                                                                                             | 4    |
| FT reactor                 | 220 °C, 25 bar, Slurry bubble column reactor<br>Catalyst mass iterated to reach 55 % CO conversion<br>Kinetic reaction model from <sup>5</sup><br>Products: n-alkanes and primary alkenes with a carbon chain length up to 30                     | 5    |
| Product separation         | Tout = 0 °C<br>Modelled with separator blocks<br>Complete separation of Products C <sub>5+</sub><br>Recycle ratio 95 % of tail gas                                                                                                                |      |
| AEL                        | 70.8 % HHV efficiency<br>Modelled as a splitter<br>p = 25 bar<br>Hydrogen output iterated for a H <sub>2</sub> /CO = 2.1 at FT inlet                                                                                                              | 6    |
| CO <sub>2</sub> Compressor | One stage compression<br>Isentropic efficiency: 80 %<br>Mechanical efficiency: 100 %                                                                                                                                                              | 1    |

Tab. 2. FCI factors for equipment cost estimation methods.

| Indirect cost factors       | 1    | 2    | 3    | 4    | 5 |
|-----------------------------|------|------|------|------|---|
| Source                      | 7    | 8    | 1    | 1    |   |
| Installation factor         | 0.39 | 0.1  | 0    | 0    | 0 |
| Instrumentation and control | 0.26 | 0.36 | 0    | 0    | 0 |
| Piping system               | 0.31 | 0.5  | 0    | 0    | 0 |
| Electrical systems          | 0.1  | 0.1  | 0    | 0    | 0 |
| Buildings                   | 0.29 | 0.18 | 0    | 0    | 0 |
| Yard improvements           | 0.12 | 0.1  | 0    | 0    | 0 |
| Service facilities          | 0.55 | 0.4  | 0    | 0    | 0 |
| Engineering and supervision | 0.32 | 0.32 | 0.15 | 0.10 | 0 |

|                   |      |      |   |   |   |
|-------------------|------|------|---|---|---|
| Construction cost | 0.34 | 0.41 | 0 | 0 | 0 |
| Legal expenditure | 0.04 | 0.04 | 0 | 0 | 0 |
| Contractor's fee  | 0.05 | 0.05 | 0 | 0 | 0 |
| Contingency       | 0.1  | 0.1  | 0 | 0 | 0 |

Tab. 3. Indirect operating expenditure factors taken from [46].

|                                | Factor [%] | Basis                               |
|--------------------------------|------------|-------------------------------------|
| Operating supervision (OS)     | 15         | OL                                  |
| Maintenance labour (ML)        | 1          | FCI                                 |
| Maintenance material (MM)      | 1          | FCI                                 |
| Operating supplies             | 15         | ML + MM                             |
| Laboratory charges             | 20         | OL                                  |
| Insurances and taxes           | 2          | FCI                                 |
| Plant overhead costs (PO)      | 60         | Total labour cost<br>(OL + OS + ML) |
| Administrative costs           | 25         | PO                                  |
| Distribution and selling cost  | 6          | NPC                                 |
| Research and development costs | 4          | NPC                                 |

## ***Mass balances***

The stream data for selected process streams is presented in Tab. 4. The streams are numbered according to the order shown in Fig. 1.

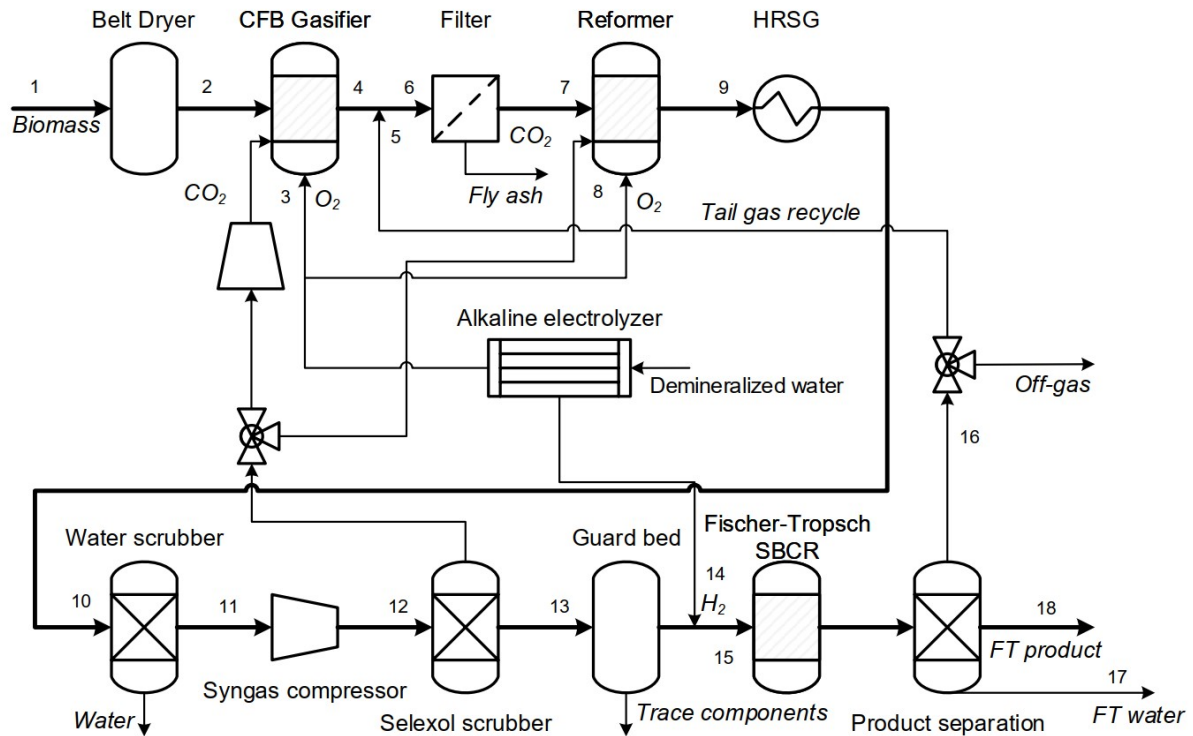

Fig. 1. Process flowsheet with stream numbers as referred to in Tab. 4.

Tab. 4. Stream data for selected process streams.

| Stream number      | 1                      | 2             | 3                              | 4                    | 5              | 6           |
|--------------------|------------------------|---------------|--------------------------------|----------------------|----------------|-------------|
|                    | Wet biomass feed Dryer | Gasifier feed | Recycle and oxygen to Gasifier | Syngas from Gasifier | Recycle syngas | Filter feed |
| Temperature °C     | 25.0                   | 65.5          | 199.9                          | 850.0                | 0.0            | 600.0       |
| Pressure bar       | 1                      | 1             | 4                              | 3.8                  | 24.9           | 3.8         |
| Molar flow kmol/s  |                        |               | 0.4946                         | 1.8158               | 3.2024         | 5.0182      |
| Mass flow kg/s     | 47.3569                | 27.857        | 18.3523                        | 46.2093              | 40.3801        | 86.5894     |
| <b>Composition</b> |                        |               |                                |                      |                |             |
| H2                 | mol/mol                |               |                                | 0.1901               | 0.5451         | 0.4167      |
| CO                 | mol/mol                |               |                                | 0.3561               | 0.2831         | 0.3095      |
| CO2                | mol/mol                |               | 0.425                          | 0.2399               | 0.0173         | 0.0979      |
| H2O                | mol/mol                |               |                                | 0.1386               |                | 0.0502      |
| O2                 | mol/mol                |               | 0.575                          |                      |                |             |
| N2                 | mol/mol                |               |                                |                      | 0.0075         | 0.0048      |
| CH4                | mol/mol                |               |                                | 0.0626               | 0.1383         | 0.1109      |
| C2H6               | mol/mol                |               |                                | 0.0021               | 0.0016         | 0.0018      |
| C3H8               | mol/mol                |               |                                |                      | 0.0014         | 0.0009      |

|                         |         |         |        |        |        |
|-------------------------|---------|---------|--------|--------|--------|
| C4H10                   | mol/mol |         |        | 0.0013 | 0.0008 |
| C10H8                   | mol/mol |         |        |        | 0.0002 |
| C6H6                    | mol/mol |         |        |        | 0.0009 |
| NH3                     | mol/mol |         | 0.0006 |        | 0.001  |
| H2S                     | mol/mol |         | 0.0026 |        | 0.0001 |
| C2H4                    | mol/mol |         |        | 0.0002 | 0.0017 |
| C3H6                    | mol/mol |         | 0.0028 | 0.0025 | 0.0016 |
| C4H8                    | mol/mol |         | 0.0002 | 0.0017 | 0.0011 |
| <b>Other components</b> |         |         |        |        |        |
| Biomass                 | kg/s    | 47.3569 | 27.857 |        |        |
| Fly ash                 | kg/s    |         |        | 0.9298 | 0.9298 |

| Stream number |        | 7             | 8                                  | 9              | 10                       | 11                   |
|---------------|--------|---------------|------------------------------------|----------------|--------------------------|----------------------|
|               |        | Reformer feed | CO2 recycle and oxygen to Reformer | Syngas to HRSG | Syngas to Water Scrubber | Syngas to Compressor |
| Temperature   | °C     | 600.0         | 199.8                              | 900.0          | 60.0                     | 30                   |
| Pressure      | bar    | 3.6           | 3.6                                | 3.4            | 3.4                      | 3.4                  |
| Molar flow    | kmol/s | 5.0182        | 0.6217                             | 5.9766         | 5.9764                   | 5.2841               |
| Mass flow     | kg/s   | 85.6596       | 23.6827                            | 109.3423       | 109.3415                 | 96.869               |

#### Composition

|       |         |        |        |        |        |        |
|-------|---------|--------|--------|--------|--------|--------|
| H2    | mol/mol | 0.4167 |        | 0.3581 | 0.3581 | 0.405  |
| CO    | mol/mol | 0.3095 |        | 0.3547 | 0.3547 | 0.4012 |
| CO2   | mol/mol | 0.0979 | 0.5072 | 0.0977 | 0.0977 | 0.1105 |
| H2O   | mol/mol | 0.0502 |        | 0.1242 | 0.1242 | 0.0095 |
| O2    | mol/mol |        | 0.4928 | 0.     | 0.     |        |
| N2    | mol/mol | 0.0048 |        | 0.0042 | 0.0042 | 0.0048 |
| CH4   | mol/mol | 0.1109 |        | 0.0605 | 0.0605 | 0.0685 |
| C2H6  | mol/mol | 0.0018 |        |        |        |        |
| C3H8  | mol/mol | 0.0009 |        |        |        |        |
| C4H10 | mol/mol | 0.0008 |        |        |        |        |
| C10H8 | mol/mol | 0.0002 |        |        |        |        |

|      |         |        |  |        |        |        |
|------|---------|--------|--|--------|--------|--------|
| C6H6 | mol/mol | 0.0009 |  |        |        |        |
| NH3  | mol/mol | 0.001  |  | 0.0004 | 0.0004 | 0.0005 |
| H2S  | mol/mol | 0.0001 |  | 0.     | 0.     | 0.0001 |
| C2H4 | mol/mol | 0.0017 |  |        |        |        |
| C3H6 | mol/mol | 0.0016 |  |        |        |        |
| C4H8 | mol/mol | 0.0011 |  |        |        |        |

| Stream number      |         | 12                         | 13                   | 14                         | 15                                | 16                           | 17       |
|--------------------|---------|----------------------------|----------------------|----------------------------|-----------------------------------|------------------------------|----------|
|                    |         | Syngas to Selexol Scrubber | Syngas to Guard Beds | Hydrogen from Electrolyzer | Syngas to Fischer-Tropsch Reactor | Fischer-Tropsch gas fraction | FT Water |
| Temperature        | °C      | 0                          | 0                    | 60                         | 220                               | 0                            | 25       |
| Pressure           | bar     | 25                         | 25                   | 25                         | 25                                | 24.9                         | 24.9     |
| Molar flow         | kmol/s  | 5.2841                     | 4.7055               | 2.2061                     | 6.9115                            | 3.3709                       | 1.1658   |
| Mass flow          | kg/s    | 96.869                     | 72.7807              | 4.4472                     | 77.2269                           | 42.5053                      | 21.0028  |
| <b>Composition</b> |         |                            |                      |                            |                                   |                              |          |
| H2                 | mol/mol | 0.405                      | 0.4548               | 1.                         | 0.6288                            | 0.5451                       |          |
| CO                 | mol/mol | 0.4012                     | 0.4505               |                            | 0.3067                            | 0.2831                       |          |
| CO2                | mol/mol | 0.1105                     | 0.0124               |                            | 0.0084                            | 0.0173                       |          |
| H2O                | mol/mol | 0.0095                     |                      |                            |                                   |                              | 1.       |
| O2                 | mol/mol |                            |                      |                            |                                   |                              |          |
| N2                 | mol/mol | 0.0048                     | 0.0054               |                            | 0.0037                            | 0.0075                       |          |
| CH4                | mol/mol | 0.0685                     | 0.0769               |                            | 0.0523                            | 0.1383                       |          |
| C2H6               | mol/mol |                            |                      |                            |                                   | 0.0016                       |          |
| C3H8               | mol/mol |                            |                      |                            |                                   | 0.0014                       |          |
| C4H10              | mol/mol |                            |                      |                            |                                   | 0.0013                       |          |
| C10H8              | mol/mol |                            |                      |                            |                                   |                              |          |
| C6H6               | mol/mol |                            |                      |                            |                                   |                              |          |
| NH3                | mol/mol | 0.0005                     |                      |                            |                                   |                              |          |
| H2S                | mol/mol | 0.0001                     | 0.                   |                            |                                   |                              |          |
| C2H4               | mol/mol |                            |                      |                            |                                   | 0.0002                       |          |





Tab. 5. Utility cost and revenue form by-products.

| Utility/Raw material  | Quantity per hour        | Market price (2020)      | Total costs per year [€/a]   |            |
|-----------------------|--------------------------|--------------------------|------------------------------|------------|
| Electricity           | 943.6(MWh)               | 50.4(€/MWh)              | 385201017.2                  |            |
| Cooling Water         | 38535.1(m <sup>3</sup> ) | 0.005(€/m <sup>3</sup> ) | 1560670.61                   |            |
| Biomass               | 170.5(t)                 | 42.232(€/t)              | 58,319,311                   |            |
| Demineralized water   | 153.9(m <sup>3</sup> )   | 2.032(€/m <sup>3</sup> ) | 2,533,575                    |            |
| Cobalt catalyst       | 7.9(kg)                  | 32.918(€/kg)             | 2,094,963                    |            |
| Selexol               | 0.0034(t)                | 4394.808(€/t)            | 121,389                      |            |
| Stack maintenance     | 16010.0(kg)              | 0.109(€/kg)              | 14,135,217                   |            |
| Waste Water           | 126.5(m <sup>3</sup> )   | 0.918(€/m <sup>3</sup> ) | 1,059,734                    |            |
| Total costs:          |                          |                          | 465,339,078                  |            |
| By-products           | Quantity per hour        | Market price (2020)      | Total revenue per year [€/a] |            |
| Low Pressure Steam    | -319.95(t)               | 13.142(€/t)              | -                            | 34,058,741 |
| Medium Pressure Steam | -109.3392(t)             | 16.057(€/t)              | -                            | 14,220,842 |
| High pressure steam   | -195.8112(t)             | 17.706(€/t)              | -                            | 28,082,968 |
| Total revenue:        |                          |                          | -                            | 76,362,552 |

Tab. 6. Equipment cost and fixed capital investment cost for all process units.

|           | Equipment cost [M€] | Fixed capital investment [M€] |
|-----------|---------------------|-------------------------------|
| Dryer     | 37.64               | 37.64                         |
| AEL Stack | 686.43              | 686.43                        |
| AEL BoP   | 60.87               | 247.12                        |
| Filter    | 19.52               | 29.18                         |
| Guard Bed | 31.74               | 38.41                         |

|                            |          |          |
|----------------------------|----------|----------|
| Selexol                    | 24.24    | 103.70   |
| Striper                    | 16.94    | 24.12    |
| CFB gasifier               | 58.78    | 71.13    |
| HRS                        | 20.32    | 30.37    |
| Refrigeration System       | 6.97     | 29.81    |
| CO <sub>2</sub> Compressor | 2.42     | 3.45     |
| Syngas Compressor          | 16.37    | 23.32    |
| Reformer                   | 50.20    | 71.50    |
| FT SBCR Vessel             | 13.99    | 59.85    |
| FT SBCR Catalyst           | 18.14    | 77.59    |
| Cold Trap                  | 0.09     | 0.38     |
| Total                      | 1,064.66 | 1,534.00 |

Tab. 7. Annuity calculation.

|                                |             |         |
|--------------------------------|-------------|---------|
| Fixed Capital Investment [FCI] | 1,534.00    | M€      |
| Working capital                | 10.00%      | of TCI  |
| Total Capital Investment [TCI] | 1,704.44    | M€      |
| Operating time of plant        | 20          | years   |
| Interest rate                  | 7.00%       |         |
| Annuity factor                 | 0.094392926 |         |
| Annuity                        | 156.73      | M€/year |

Tab. 8. Net production cost calculation (NPC).

| Direct production costs | Cost per year [M€/a] |
|-------------------------|----------------------|
| Operating labour [OL]   | 3.45                 |
| Operating supervision   | 0.52                 |
| Maintenance labour      | 15.34                |

|                                  |                             |
|----------------------------------|-----------------------------|
| Maintenance material             | 15.34                       |
| Operating supplies               | 4.60                        |
| Laboratory charges               | 0.69                        |
| Raw materials and utilities      | 464.91                      |
| Revenue from by-products         | - 76.36                     |
| Indirect production costs        | -                           |
| Insurances and taxes             | 30.68                       |
| Plant overhead costs             | 11.59                       |
| General expenses                 | -                           |
| Administrative costs             | 2.90                        |
| Annuity                          | 156.73                      |
|                                  | 630.38                      |
| <b>Indirect production costs</b> | <b>Cost per year [M€/a]</b> |
| Distribution and selling costs   | 42.03                       |
| Research and development costs   | 28.02                       |
| Production cost                  | 700.42                      |
| Product output per year [Mt/a]   | 0.40                        |
| Net production cost [€/kg]       | 1.75                        |

### ***Local economic/ecologic analysis***

Tab. 9. National economic/ecologic conditions relevant for the PBtL production.

| <b>NUTS0</b> | <b>Electricity price<br/>[€/MWh] <sup>9</sup></b> | <b>Carbon intensity<br/>[gCO<sub>2</sub>eq/kWh] <sup>10</sup></b> | <b>Labour cost [€/h]<br/><sup>11</sup></b> | <b>Transport Cost [€/t/km]<br/><sup>12</sup></b> |
|--------------|---------------------------------------------------|-------------------------------------------------------------------|--------------------------------------------|--------------------------------------------------|
| FR           | 53.5                                              | 51.1                                                              | 37.5                                       | 0.48                                             |
| AL           | 51.6                                              | -                                                                 | 2.6 <sup>a</sup>                           | 0.18                                             |
| AT           | 73.6                                              | 82.4                                                              | 36.7                                       | 0.45                                             |
| BA           | 62.7                                              | -                                                                 | 5.2 <sup>a</sup>                           | 0.19                                             |
| BE           | 41.8                                              | 161.0                                                             | 41.1                                       | 0.47                                             |
| BG           | 57.9                                              | 410.4                                                             | 6.5                                        | 0.22                                             |
| CY           | 114 <sup>a</sup>                                  | 620.9                                                             | 17                                         | 0.36                                             |
| CZ           | 63.2 <sup>a</sup>                                 | 436.6                                                             | 14.1                                       | 0.29                                             |
| DE           | 64.3                                              | 311.0                                                             | 36.6                                       | 0.45                                             |
| DK           | 47.1                                              | 109.0                                                             | 45.8                                       | 0.68                                             |
| EE           | 68.8 <sup>a</sup>                                 | 774.9                                                             | 13.6                                       | 0.28                                             |

|    |                   |                 |                   |                   |
|----|-------------------|-----------------|-------------------|-------------------|
| EL | 59.7 <sup>a</sup> | 479.2           | 16.9              | 0.37              |
| ES | 50.3              | 156.4           | 22.8              | 0.41              |
| FI | 45.9              | 68.6            | 34.3              | 0.49              |
| HR | 58.4              | 133.8           | 10.8              | 0.26              |
| HU | 65.6              | 216.4           | 9.9               | 0.24              |
| IE | 78.6              | 278.6           | 32.3              | 0.44              |
| IT | 57.8              | 213.4           | 29.8              | 0.45              |
| LT | 63.2 <sup>a</sup> | 45.4            | 10.1              | 0.24              |
| LU | 47.3 <sup>a</sup> | 58.5            | 42.1              | 0.48              |
| LV | 69.5 <sup>a</sup> | 106.5           | 10.5              | 0.26              |
| ME | 56.9              | -               | 5.6 <sup>a</sup>  | 0.2               |
| MK | 53.4              | -               | 3.6 <sup>a</sup>  | 0.17              |
| MT | 86 <sup>a</sup>   | 379.0           | 14.5              | 0.3               |
| NL | 59.5              | 328.4           | 36.8              | 0.5               |
| NO | 30.8              | 19 <sup>d</sup> | 47.3              | 0.53 <sup>c</sup> |
| PL | 75.3              | 709.8           | 11                | 0.27              |
| PT | 69.8              | 198.4           | 15.7              | 0.29              |
| RO | 67.5              | 299.5           | 8.1               | 0.21              |
| RS | 58.3              | -               | 5.8 <sup>a</sup>  | 0.19              |
| SE | 35.6              | 8.8             | 37.3              | 0.53              |
| SI | 65.2 <sup>a</sup> | 217.8           | 19.9              | 0.32              |
| SK | 94.4              | 101.7           | 13.4              | 0.27              |
| UK | 136.1             | 225.0           | 28.5 <sup>a</sup> | 0.48              |

*a data from past years used instead of 2020S1.*

*b Electricity price from 70 – 150 GWh consumer category.*

*c Assumed same transport cost as Sweden*

*d Value from 2019 used <sup>13</sup>*

### **GHG Abatement cost calculation**

Tab. 10. Assumptions for the GHG abatement calculation.

|                                           | <i>Value</i>  | <i>Unit</i>      |
|-------------------------------------------|---------------|------------------|
| <b>Oil price (Brent)<sup>14</sup></b>     | <b>75.06</b>  | <b>\$/barrel</b> |
| <b>Volumetric conversion<sup>13</sup></b> | <b>158.98</b> | <b>l/barrel</b>  |
| <b>Currency conversion<sup>15</sup></b>   | <b>0.877</b>  | <b>€/€</b>       |
| <b>Oil price</b>                          | <b>0.415</b>  | <b>€/l</b>       |

## Impact categories for LCA

Tab. 11. Impact categories used in the LCA.

| Impact category                               | Indicator                                                                                                       | Unit                             | Abbreviation |
|-----------------------------------------------|-----------------------------------------------------------------------------------------------------------------|----------------------------------|--------------|
| Climate change                                | Radiative forcing as Global Warming Potential (GWP100)                                                          | kg CO <sub>2</sub> eq            | GWP          |
| Ozone depletion                               | Ozone Depletion Potential (ODP)                                                                                 | kg CFC-11eq                      | ODP          |
| Particulate matter/<br>Respiratory inorganics | Human health effects associated with exposure to PM2.5                                                          | Disease incidences               | PM           |
| Photochemical ozone formation                 | Tropospheric ozone concentration increase                                                                       | kg NMVOC eq                      | POF          |
| Acidification                                 | Accumulated Exceedance (AE)                                                                                     | mol H+ eq                        | AP           |
| Eutrophication, terrestrial                   | Accumulated Exceedance (AE)                                                                                     | mol N eq                         | TEP          |
| Eutrophication, aquatic freshwater            | Fraction of nutrients reaching freshwater end compartment (P)                                                   | kg P eq                          | FEP          |
| Eutrophication, aquatic marine                | Fraction of nutrients reaching marine end compartment (N)                                                       | kg N eq                          | MEP          |
| Ecotoxicity (freshwater)                      | Comparative Toxic Unit for ecosystems (CTUe)                                                                    | CTUe                             | FETP         |
| Land use                                      | Soil quality index (Biotic production, Erosion resistance, Mechanical filtration and Groundwater replenishment) | Dimensionless , aggregated index | LU           |
| Water scarcity                                | User deprivation potential (deprivation-weighted water consumption)                                             | kg world eq. deprived            | WS           |
| Resource use, minerals and metals             | Abiotic resource depletion (ADP ultimate reserves)                                                              | kg Sb eq                         | MM           |
| Resource use, energy carriers                 | Abiotic resource depletion – fossil fuels (ADP-fossil)                                                          | MJ                               | ECF          |

## Economic allocation

Tab. 12. Economic allocation factors for the LCA.

| Flow                  | Quantity [t/h] | Price [€/t] | Revenue [€/h] | Allocation factor |
|-----------------------|----------------|-------------|---------------|-------------------|
| FT product            | 49.39          | 1,750.00    | 86,428.27     | 0.9016            |
| Low Pressure Steam    | 319.95         | 13.14       | 4,204.78      | 0.0439            |
| Medium Pressure Steam | 109.34         | 16.06       | 1,755.66      | 0.0183            |
| High pressure steam   | 195.81         | 17.71       | 3,467.03      | 0.0362            |
| Total                 | -              | -           | 95,855.74     | 1                 |

## Life Cycle Inventories

The following tables contain the data used to model the PBtL processes as part of the LCA. The names and locations of the process flows correspond to the ones used in the ecoinvent v3.7.1 database. In the processes that include electricity as an input (i.e. Selexol production and PBtL production) the electricity entry was adapted to correspond to the respective scenario (e.g. Swedish grid). For the sake of simplicity only one such case is shown here. The amounts shown here correspond to the base case as described in Section 6. Flows with no entry in the column “Location” are biosphere flows. Tab. 13 to Tab. 21 list the LCIs for the processes that make up the LCI of the entire PBtL production process shown in Fig. 1.

Tab. 13. LCI of the production of 1 kg of Selexol taken from <sup>16</sup>.

| Selexol production flows                   | Amount   | Unit          | Location |
|--------------------------------------------|----------|---------------|----------|
| market for ethylene oxide                  | 7.50E-01 | kg            | RER      |
| market for methanol                        | 0.2      | kg            | GLO      |
| market for water, decarbonised             | 0.05     | kg            | DE       |
| market for natural gas, high pressure      | 0.05     | cubic meter   | DE       |
| steam production, in chemical industry     | 0.5      | kg            | RER      |
| market for electricity, medium voltage     | 3.00E-01 | kilowatt hour | EE       |
| Water, cooling, unspecified natural origin | 2.50E-02 | cubic meter   |          |
| Methanol                                   | 1.00E-04 | kg            |          |
| Ethylene oxide                             | 1.00E-04 | kg            |          |

Tab. 14. LCI for the production of 1 kg of cobalt catalyst based on <sup>5</sup>.

| Cobalt catalyst production flows                                | Amount | Unit | Location                   |
|-----------------------------------------------------------------|--------|------|----------------------------|
| market for cobalt                                               | 0.25   | kg   | GLO                        |
| market for molybdenum                                           | 0.0356 | kg   | GLO                        |
| market for aluminium oxide, non-metallurgical                   | 0.7452 | kg   | IAI Area, EU27 & EFTA      |
| market for process-specific burdens, residual material landfill | 1      | kg   | Europe without Switzerland |

Tab. 15. LCI for the production of 1 kg of nickel catalyst based on the data acquired in the FLEXCHX project.

| Nickel catalyst production flows                                | Amount | Unit | Location                   |
|-----------------------------------------------------------------|--------|------|----------------------------|
| market for nickel, class 1                                      | 0.15   | kg   | GLO                        |
| market for aluminium oxide, non-metallurgical                   | 0.85   | kg   | IAI Area, EU27 & EFTA      |
| market for process-specific burdens, residual material landfill | 1      | kg   | Europe without Switzerland |

Tab. 16. LCI for the production of 1 kg of guard bed material.

| Guard bed material production flows | Amount | Unit | Location |
|-------------------------------------|--------|------|----------|
|-------------------------------------|--------|------|----------|

|                                                                 |   |    |                            |
|-----------------------------------------------------------------|---|----|----------------------------|
| market for activated carbon, granular                           | 1 | kg | GLO                        |
| market for process-specific burdens, residual material landfill | 1 | kg | Europe without Switzerland |

Tab. 17. LCI for the provision of 1 kg of forest residue biomass. This inventory is based in the ecoinvent activity "market for wood chips, wet, measured as dry mass, Europe without Switzerland", but adapted to not include the biomass coming from sawmills, in order to only describe primary residues. The transport activities contained in the original ecoinvent process were omitted here and explicitly included in the PBtL-production LCI as a separate flow.

| Forest residue biomass flows                             | Amount | Unit | Location |
|----------------------------------------------------------|--------|------|----------|
| hardwood forestry, birch, sustainable forest management  | 0.399  | kg   | SE       |
| softwood forestry, spruce, sustainable forest management | 0.1709 | kg   | SE       |
| softwood forestry, pine, sustainable forest management   | 0.157  | kg   | SE       |
| hardwood forestry, beech, sustainable forest management  | 0.137  | kg   | DE       |
| softwood forestry, spruce, sustainable forest management | 0.068  | kg   | DE       |
| softwood forestry, pine, sustainable forest management   | 0.042  | kg   | DE       |
| hardwood forestry, oak, sustainable forest management    | 0.027  | kg   | DE       |

Tab. 18. LCI for the construction of a PBtL plant corresponding to the base case of a 400 MW plant. The assumed lifetime is 20 years. This is a combination of data from ecoinvent processes for a syngas plant and a refinery plant each scaled to the capacity of the PBtL plant, and data from literature for the electrolysis plant (also scaled up to the modelled electrolyzer capacity) <sup>17</sup>. The output of this process is one unit of PBtL plant.

| PBtL plant construction flows                    | Amount   | Unit | Location |
|--------------------------------------------------|----------|------|----------|
| synthetic gas factory construction               | 1.00E+02 | unit | CH       |
| petroleum refinery construction                  | 4.00E-01 | unit | RER      |
| market for steel, low-alloyed                    | 2.82E+07 | kg   | GLO      |
| market for aluminium, cast alloy                 | 7.04E+04 | kg   | GLO      |
| market for chromium                              | 1.53E+05 | kg   | GLO      |
| market for nickel, class 1                       | 3.13E+05 | kg   | GLO      |
| market for polyethylene, high density, granulate | 5.54E+04 | kg   | GLO      |

Tab. 19. LCI of the emissions and associated waste treatment processes from the production of 1 MJ of FT product as derived from the Aspen Plus model. The output of this process is one unit of emissions.

| Emission flows                                       | Amount    | Unit | Location                   |
|------------------------------------------------------|-----------|------|----------------------------|
| market for wood ash mixture, pure                    | -1.54E-03 | kg   | Europe without Switzerland |
| Hydrogen (to air)                                    | 2.20E-09  | kg   |                            |
| Carbon monoxide, from soil or biomass stock (to air) | 8.89E-09  | kg   |                            |
| Carbon dioxide, from soil or biomass stock (to air)  | 5.74E-03  | kg   |                            |
| Nitrogen (to water)                                  | 1.024E-10 | kg   |                            |
| Nitrogen (to air)                                    | 5.887E-05 | kg   |                            |

|                                              |           |    |
|----------------------------------------------|-----------|----|
| Methane, from soil or biomass stock (to air) | 6.06E-09  | kg |
| Ammonia (to air)                             | 7.168E-05 | kg |
| Hydrogen sulfide (to water)                  | 1.671E-05 | kg |

Tab. 20. LCI of other commodities needed for the production of 1 MJ of FT product as derived from the Aspen Plus model. The output of this process is one unit of other commodities.

| Other commodity flows                      | Amount   | Unit        | Location                   |
|--------------------------------------------|----------|-------------|----------------------------|
| market for water, deionised                | 7.10E-02 | kg          | Europe without Switzerland |
| market for potassium hydroxide             | 1.48E-05 | kg          | GLO                        |
| Water, cooling, unspecified natural origin | 1.78E-02 | cubic meter |                            |

Tab. 21. LCI of the modelled PBtL plant for the production of 1 MJ of FT product. The LCI includes the flows as listed in the tables above. Amounts in this LCI have been scaled with the economic allocation factor as presented in section 6.5.

| PBtL production flows                             | Amount    | Unit          | Location                   |
|---------------------------------------------------|-----------|---------------|----------------------------|
| Forest residue biomass                            | 4.17E-02  | kg            | Europe without Switzerland |
| transport, freight, lorry 16-32 metric ton, EURO6 | 7.09E-03  | ton kilometer | RER                        |
| market for electricity, medium voltage            | 3.92E-01  | kilowatt hour | SE                         |
| Other commodities                                 | 9.02E-01  | unit          | GLO                        |
| Selexol production                                | 1.42E-06  | kg            | RER                        |
| Cobalt catalyst production                        | 3.27E-06  | kg            | RER                        |
| Nickel catalyst production                        | 2.74E-06  | kg            | RER                        |
| Guard bed material production                     | 2.00E-06  | kg            | RER                        |
| Emissions                                         | 9.02E-01  | unit          | GLO                        |
| PBtL plant construction                           | 2.566E-12 | unit          | RER                        |



### ***Additional visualisations***

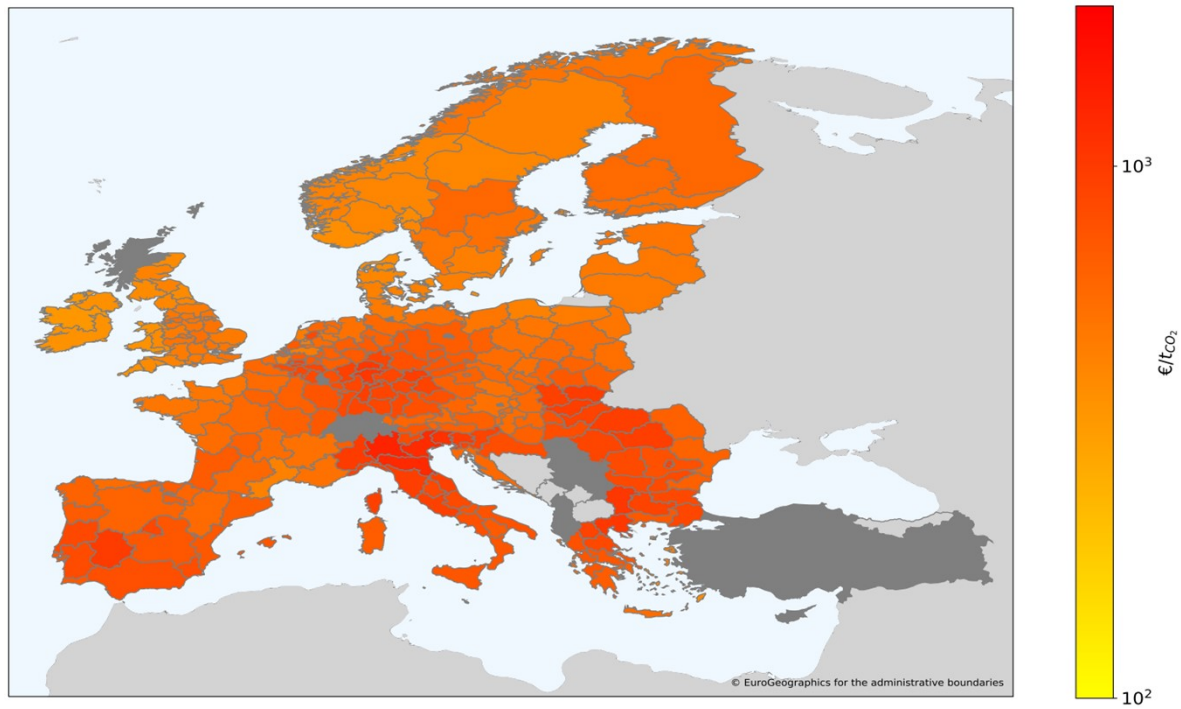

Fig. 2. Abatement cost [ $\text{€}_{2020}/\text{t}_{\text{CO}_2}$ ] for wind park connected PBtL production in the hydrogen storage scenario.

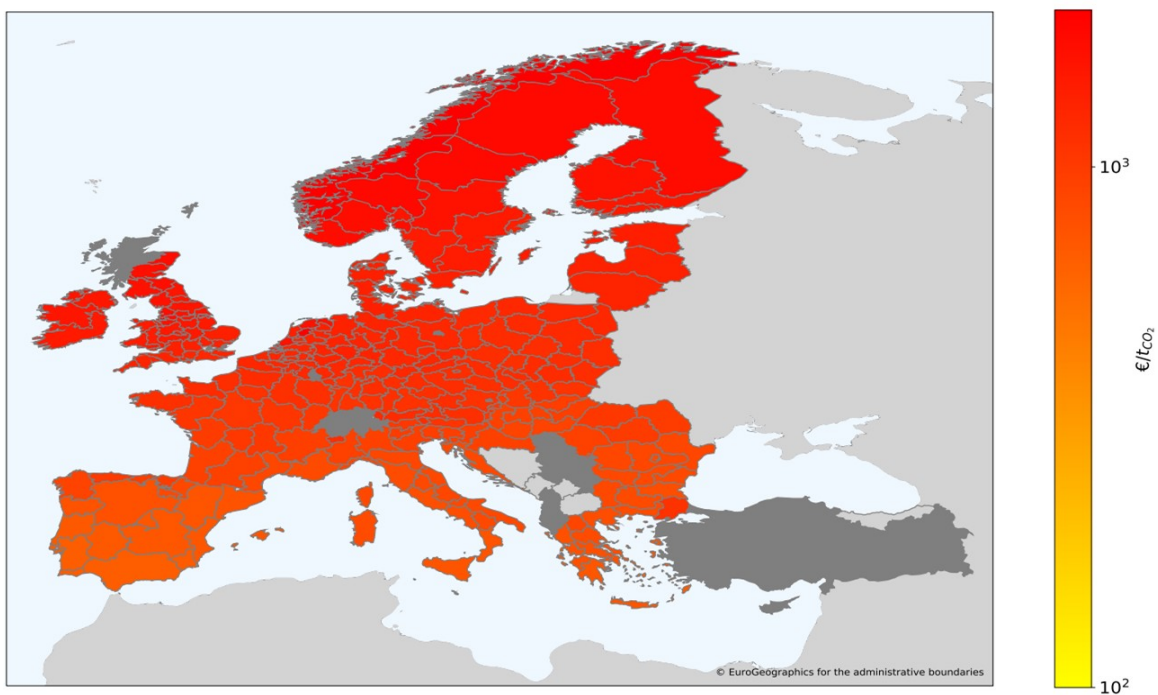

Fig. 3. Abatement cost [ $\text{€}_{2020}/\text{t}_{\text{CO}_2}$ ] for PV connected PBtL production in 2020 in the hydrogen storage scenario.

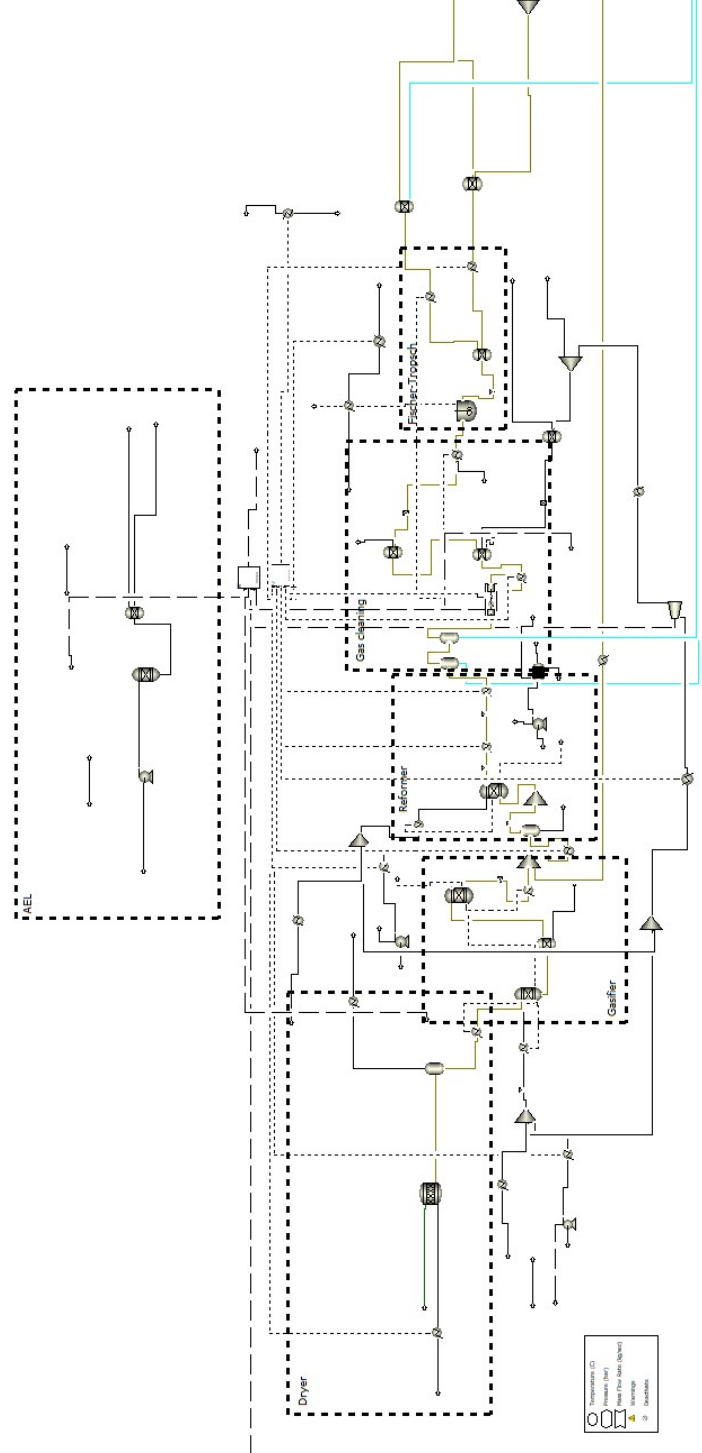

Fig. 4 Aspen Plus flowsheet of the PBtL process

## References

1. I. Hannula, *Energy*, 2016, **104**, 199-212.
2. M. Hillestad, M. Ostadi, G. A. Serrano, E. Rytter, B. Austbø, J. Pharoah and O. S. Burheim, *Fuel*, 2018, **234**, 1431-1451.
3. C. N. Hamelinck and A. P. Faaij, *Energy policy*, 2006, **34**, 3268-3283.
4. C. Frilund, E. Kurkela and I. Hiltunen, *Biomass Conversion and Biorefinery*, 2021, DOI: 10.1007/s13399-021-01680-x.
5. B. Todic, T. Bhatelia, G. F. Froment, W. Ma, G. Jacobs, B. H. Davis and D. B. Bukur, *Industrial Engineering Chemistry Research*, 2013, **52**, 669-679.
6. A. Buttler and H. Spliethoff, *Renewable and Sustainable Energy Reviews*, 2018, **82**, 2440-2454.
7. M. S. Peters, K. D. Timmerhaus and R. E. West, *Plant design and economics for chemical engineers*, McGraw-Hill New York, 2003.
8. F. Habermeyer, E. Kurkela, S. Maier and R.-U. Dietrich, *Frontiers in Energy Research*, 2021, **9**, 684.
9. Eurostat, Electricity prices for non-household consumers - bi-annual data, <http://appsso.eurostat.ec.europa.eu/nui/submitViewTableAction.do>, (accessed 31. January, 2022).
10. European Environmental Agency, Greenhouse gas emission intensity of electricity generation by country [https://www.eea.europa.eu/data-and-maps/daviz/co2-emission-intensity-9/#tab-googlechartid\\_googlechartid\\_googlechartid\\_chart\\_1111](https://www.eea.europa.eu/data-and-maps/daviz/co2-emission-intensity-9/#tab-googlechartid_googlechartid_googlechartid_chart_1111), (accessed 31. January, 2022).
11. Eurostat, Labour cost levels by NACE Rev. 2 activity, [https://ec.europa.eu/eurostat/databrowser/product/page/LC\\_LCI\\_LEV\\$DEFAULTVIEW](https://ec.europa.eu/eurostat/databrowser/product/page/LC_LCI_LEV$DEFAULTVIEW), (accessed 31. January, 2022).
12. P. Ruiz, A. Sgobbi, W. Nijs, C. Thiel, F. Dalla Longa, T. Kober, B. Elbersen and G. Hengeveld, *JRC Science for Policy Report, European Commission*, 2015.
13. I. Staffell, The Energy and Fuel Data Sheet, [https://www.claverton-energy.com/wordpress/wp-content/uploads/2012/08/the\\_energy\\_and\\_fuel\\_data\\_sheet1.pdf](https://www.claverton-energy.com/wordpress/wp-content/uploads/2012/08/the_energy_and_fuel_data_sheet1.pdf), (accessed 11, 2021).
14. finanzen.net, Oil price (Brent), <https://www.finanzen.net/rohstoffe/oelpreis>, (accessed 1. November, 2022).
15. ExchangeRates.org.uk, US Dollar to Euro Spot Exchange Rates for 2020, <https://www.exchangerates.org.uk/USD-EUR-spot-exchange-rates-history-2020.html>, (accessed 22.11., 2022).
16. W. Schakel, H. Meerman, A. Talaei, A. Ramírez and A. Faaij, *Applied Energy*, 2014, **131**, 441-467.
17. C. Wulf and M. Kaltschmitt, *Sustainability*, 2018, **10**, 1699.
